# Supplementary material for: Complete Plastomes of Ten Rorippa Species (Brassicaceae): Comparative Analysis and Phylogenetic Relationships
Source: MDPI journal article supplement (doi:10.3390/agronomy14050913), 2024-04-26
Supplement: s1 [file s1]

## Supplementary files

### Figure legend

**Figure S1:** Mauve alignment of ten *Rorippa* plastomes. Within each of the alignment, local collinear blocks are represented by blocks of the same color connected by lines.

**Figure S2:** Sequence identity plot of the ten *Rorippa* plastomes using *R. indica* as a reference.

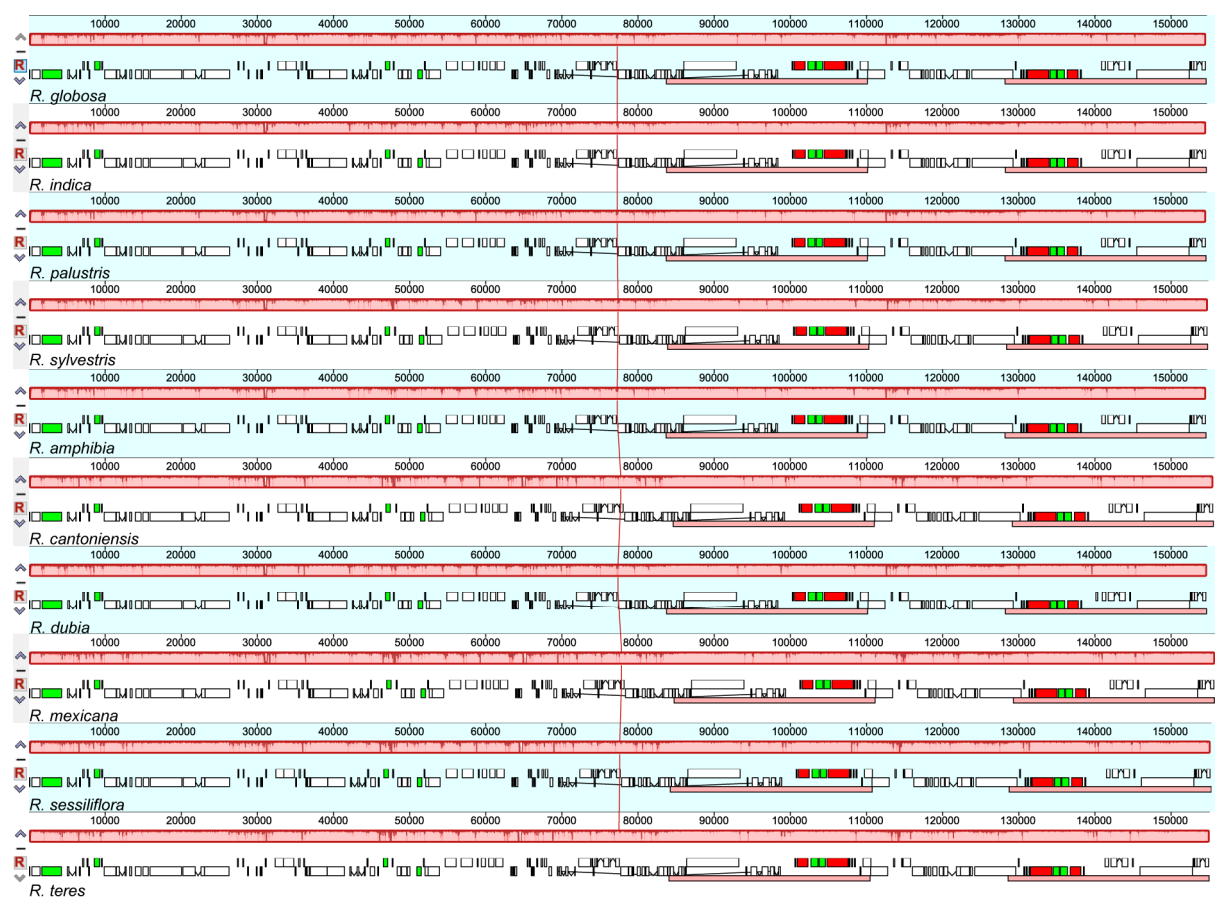

Figure S1

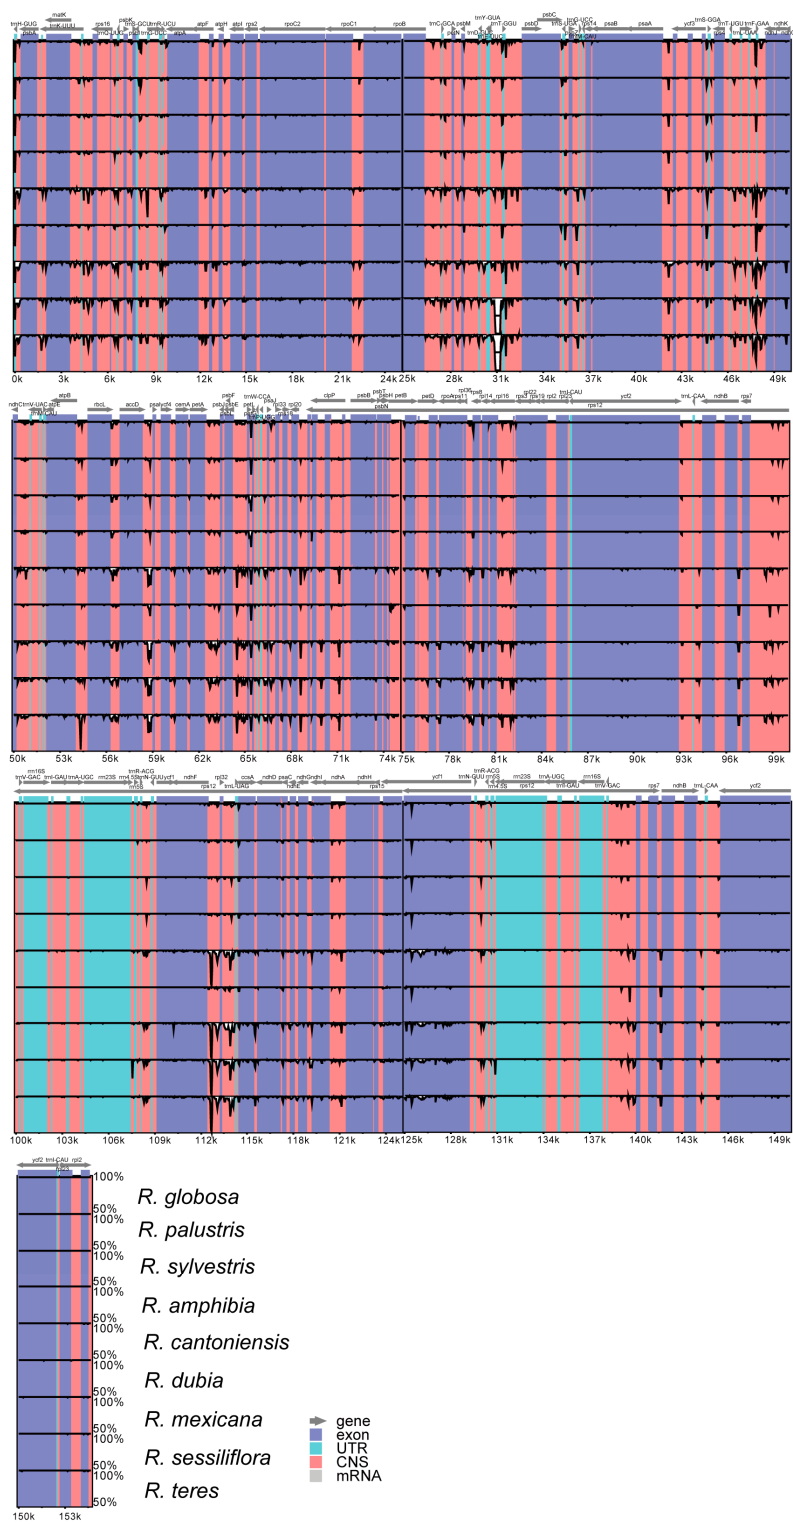

Figure S2

**Table S1 Collection locality and voucher information are provided for four newly sequenced plastomes.**

| Species              | Locality                 | Voucher information | Herbarium information |
|----------------------|--------------------------|---------------------|-----------------------|
| <i>R. globosa</i>    | Qianyang, Shaanxi, China | 1647                | XBGH                  |
| <i>R. indica</i>     | Xi'an, Shaanxi, China    | RT2022110701        | XBGH                  |
| <i>R. palustris</i>  | Xi'an, Shaanxi, China    | RT2023062002        | XBGH                  |
| <i>R. sylvestris</i> | Taibai, Shaanxi, China   | 1662                | XBGH                  |

XBGH: Xi'an Botanical Garden of Shaanxi Province.

**Table S2 List of genes in the plastome of ten *Rorippa* species.**

| Gene group                          | Gene name                                                                                                                                                                                                                                                                                                                             |
|-------------------------------------|---------------------------------------------------------------------------------------------------------------------------------------------------------------------------------------------------------------------------------------------------------------------------------------------------------------------------------------|
| Ribosomal RNAs                      | rrn16(2), rrn23(2), rrn4.5(2), rrn5(2)                                                                                                                                                                                                                                                                                                |
| Transfer RNAs                       | trnA-UGC*(2), trnC-GCA, trnD-GUC, trnE-UUC, trnF-GAA, trnM-CAU, trnG-UCC*, trnG-GCC, trnH-GUG, trnI-CAU(2), trnI-GAU*(2), trnK-UUU*, trnL-CAA(2), trnL-UAA*, trnL-UAG, trnM-CAU, trnN-GUU(2), trnP-UGG, trnQ-UUG, trnR-ACG(2), trnR-UCU, trnS-GCU, trnS-GGA, trnS-UGA, trnT-GGU, trnT-UGU, trnV-GAC(2), trnV-UAC*, trnW-CCA, trnY-GUA |
| Proteins of small ribosomal subunit | rps16*, rps2, rps14, rps15, rps4, rps7(2), rps18, rps12* (2), rps11, rps8, rps3, rps19(2)                                                                                                                                                                                                                                             |
| Proteins of large ribosomal subunit | rpl33, rpl20, rpl36, rpl14, rpl16*, rpl22, rpl2* (2), rpl23(2), rpl32                                                                                                                                                                                                                                                                 |
| Subunits of RNA polymerase          | rpoC2, rpoC1*                                                                                                                                                                                                                                                                                                                         |
| Photosystem I                       | psaB, psaA, psaI, psaJ, psaC                                                                                                                                                                                                                                                                                                          |
| Photosystem II                      | psbA, psbB, psbD, psbE, psbF, psbH, psbI, psbJ, psbK, psbL, psbM, psbN, psbT, psbZ                                                                                                                                                                                                                                                    |
| Cytochrome b/f complex              | petA, petB*, petD*, petG, petL, petN                                                                                                                                                                                                                                                                                                  |
| Subunits of ATP synthase            | atpA, atpB, atpE, atpF*, atpH, atpI                                                                                                                                                                                                                                                                                                   |
| Protease                            | clpP**                                                                                                                                                                                                                                                                                                                                |
| Large subunit of rubisco            | rbcL                                                                                                                                                                                                                                                                                                                                  |
| NADH dehydrogenase                  | ndhA*, ndhB*(2), ndhC, ndhD, ndhE, ndhF, ndhG, ndhH, ndhI, ndhJ, ndhK                                                                                                                                                                                                                                                                 |
| Maturase                            | matK                                                                                                                                                                                                                                                                                                                                  |
| Envelope membrane protein           | cemA                                                                                                                                                                                                                                                                                                                                  |
| Acetyl-CoA carboxylase              | accD                                                                                                                                                                                                                                                                                                                                  |
| Synthesis gene                      | ccsA                                                                                                                                                                                                                                                                                                                                  |
| Open reading frames (ORF, ycf)      | ycf1, ycf2(2), ycf3**, ycf4, ycf15(2)                                                                                                                                                                                                                                                                                                 |

\* indicates gene with one introns;

\*\* indicates gene with two introns;

(2) indicates gene repeated in the IRs;

The *rps16* gene in *R. dubia* and *R. mexicana* plastome was identified as pseudogene.

**Table S3 Codon usage and relative synonymous codon usage (RSCU) values of protein-coding genes of ten *Rorippa* species.**

| Codon  | <i>R. globosa</i> |      | <i>R. indica</i> |      | <i>R. palustris</i> |      | <i>R. sylvestris</i> |      | <i>R. amphibia</i> |      | <i>R. cantoniensis</i> |      | <i>R. dubia</i> |      | <i>R. mexicana</i> |      | <i>R. sessiliflora</i> |      | <i>R. teres</i> |      |
|--------|-------------------|------|------------------|------|---------------------|------|----------------------|------|--------------------|------|------------------------|------|-----------------|------|--------------------|------|------------------------|------|-----------------|------|
|        | Number            | RSCU | Number           | RSCU | Number              | RSCU | Number               | RSCU | Number             | RSCU | Number                 | RSCU | Number          | RSCU | Number             | RSCU | Number                 | RSCU | Number          | RSCU |
| UUU(F) | 888               | 1.4  | 886              | 1.4  | 889                 | 1.4  | 887                  | 1.4  | 888                | 1.4  | 889                    | 1.4  | 886             | 1.4  | 895                | 1.41 | 889                    | 1.4  | 890             | 1.4  |
| UUC(F) | 380               | 0.6  | 380              | 0.6  | 380                 | 0.6  | 382                  | 0.6  | 382                | 0.6  | 383                    | 0.6  | 382             | 0.6  | 379                | 0.59 | 385                    | 0.6  | 383             | 0.6  |
| UUA(L) | 807               | 2.16 | 811              | 2.17 | 807                 | 2.16 | 808                  | 2.16 | 807                | 2.16 | 801                    | 2.14 | 808             | 2.16 | 807                | 2.16 | 805                    | 2.15 | 804             | 2.15 |
| UUG(L) | 406               | 1.09 | 407              | 1.09 | 406                 | 1.09 | 408                  | 1.09 | 408                | 1.09 | 411                    | 1.1  | 408             | 1.09 | 407                | 1.09 | 409                    | 1.09 | 408             | 1.09 |
| CUU(L) | 474               | 1.27 | 473              | 1.26 | 474                 | 1.27 | 474                  | 1.27 | 476                | 1.27 | 473                    | 1.26 | 474             | 1.27 | 473                | 1.27 | 472                    | 1.26 | 475             | 1.27 |
| CUC(L) | 123               | 0.33 | 123              | 0.33 | 123                 | 0.33 | 124                  | 0.33 | 124                | 0.33 | 123                    | 0.33 | 123             | 0.33 | 122                | 0.33 | 122                    | 0.33 | 124             | 0.33 |
| CUA(L) | 309               | 0.83 | 306              | 0.82 | 309                 | 0.83 | 306                  | 0.82 | 305                | 0.82 | 307                    | 0.82 | 306             | 0.82 | 304                | 0.81 | 304                    | 0.81 | 308             | 0.82 |
| CUG(L) | 125               | 0.33 | 127              | 0.34 | 125                 | 0.33 | 125                  | 0.33 | 125                | 0.33 | 129                    | 0.34 | 128             | 0.34 | 130                | 0.35 | 130                    | 0.35 | 126             | 0.34 |
| AUU(I) | 933               | 1.51 | 931              | 1.51 | 933                 | 1.51 | 932                  | 1.51 | 935                | 1.51 | 940                    | 1.52 | 932             | 1.51 | 945                | 1.52 | 943                    | 1.52 | 942             | 1.52 |
| AUC(I) | 326               | 0.53 | 326              | 0.53 | 326                 | 0.53 | 325                  | 0.53 | 325                | 0.53 | 330                    | 0.53 | 326             | 0.53 | 323                | 0.52 | 330                    | 0.53 | 325             | 0.52 |
| AUA(I) | 594               | 0.96 | 594              | 0.96 | 594                 | 0.96 | 594                  | 0.96 | 594                | 0.96 | 589                    | 0.95 | 594             | 0.96 | 592                | 0.95 | 586                    | 0.95 | 592             | 0.96 |
| AUG(M) | 472               | 1    | 471              | 1    | 472                 | 1    | 472                  | 1    | 475                | 1    | 472                    | 1    | 470             | 1    | 471                | 1    | 472                    | 1    | 472             | 1    |
| GUU(V) | 431               | 1.49 | 432              | 1.49 | 431                 | 1.49 | 433                  | 1.5  | 433                | 1.49 | 432                    | 1.5  | 434             | 1.5  | 432                | 1.5  | 432                    | 1.5  | 432             | 1.5  |
| GUC(V) | 145               | 0.5  | 146              | 0.5  | 145                 | 0.5  | 146                  | 0.5  | 145                | 0.5  | 145                    | 0.5  | 145             | 0.5  | 143                | 0.5  | 143                    | 0.5  | 143             | 0.5  |
| GUA(V) | 422               | 1.46 | 421              | 1.45 | 422                 | 1.46 | 421                  | 1.45 | 423                | 1.46 | 415                    | 1.44 | 419             | 1.45 | 414                | 1.44 | 416                    | 1.44 | 417             | 1.45 |
| GUG(V) | 159               | 0.55 | 159              | 0.55 | 159                 | 0.55 | 158                  | 0.55 | 158                | 0.55 | 160                    | 0.56 | 160             | 0.55 | 162                | 0.56 | 161                    | 0.56 | 158             | 0.55 |
| UCU(S) | 471               | 1.77 | 471              | 1.78 | 471                 | 1.77 | 470                  | 1.77 | 470                | 1.77 | 462                    | 1.75 | 468             | 1.77 | 465                | 1.76 | 463                    | 1.76 | 465             | 1.76 |
| UCC(S) | 232               | 0.87 | 233              | 0.88 | 232                 | 0.87 | 230                  | 0.87 | 232                | 0.87 | 237                    | 0.9  | 234             | 0.88 | 234                | 0.89 | 236                    | 0.9  | 236             | 0.9  |
| UCA(S) | 312               | 1.17 | 311              | 1.17 | 312                 | 1.17 | 311                  | 1.17 | 311                | 1.17 | 308                    | 1.17 | 309             | 1.17 | 307                | 1.16 | 307                    | 1.17 | 307             | 1.17 |
| UCG(S) | 153               | 0.58 | 153              | 0.58 | 153                 | 0.58 | 156                  | 0.59 | 156                | 0.59 | 154                    | 0.58 | 156             | 0.59 | 155                | 0.59 | 153                    | 0.58 | 153             | 0.58 |
| CCU(P) | 346               | 1.63 | 343              | 1.61 | 346                 | 1.63 | 346                  | 1.63 | 346                | 1.63 | 349                    | 1.64 | 345             | 1.62 | 347                | 1.63 | 347                    | 1.62 | 349             | 1.63 |
| CCC(P) | 156               | 0.73 | 159              | 0.75 | 156                 | 0.73 | 155                  | 0.73 | 155                | 0.73 | 149                    | 0.7  | 156             | 0.73 | 154                | 0.72 | 154                    | 0.72 | 152             | 0.71 |
| CCA(P) | 245               | 1.15 | 245              | 1.15 | 245                 | 1.15 | 245                  | 1.15 | 245                | 1.15 | 249                    | 1.17 | 245             | 1.15 | 248                | 1.16 | 249                    | 1.16 | 250             | 1.17 |
| CCG(P) | 102               | 0.48 | 103              | 0.48 | 102                 | 0.48 | 103                  | 0.49 | 103                | 0.49 | 105                    | 0.49 | 104             | 0.49 | 105                | 0.49 | 105                    | 0.49 | 103             | 0.48 |
| ACU(T) | 442               | 1.63 | 441              | 1.63 | 442                 | 1.63 | 442                  | 1.63 | 443                | 1.63 | 441                    | 1.63 | 442             | 1.63 | 443                | 1.63 | 446                    | 1.65 | 445             | 1.64 |
| ACC(T) | 186               | 0.69 | 185              | 0.68 | 186                 | 0.69 | 186                  | 0.69 | 186                | 0.69 | 186                    | 0.69 | 185             | 0.68 | 186                | 0.69 | 184                    | 0.68 | 185             | 0.68 |
| ACA(T) | 345               | 1.27 | 343              | 1.27 | 345                 | 1.27 | 345                  | 1.27 | 346                | 1.28 | 342                    | 1.27 | 343             | 1.27 | 342                | 1.26 | 341                    | 1.26 | 341             | 1.26 |

|        |     |      |     |      |     |      |     |      |     |      |     |      |     |      |     |      |     |      |     |      |
|--------|-----|------|-----|------|-----|------|-----|------|-----|------|-----|------|-----|------|-----|------|-----|------|-----|------|
| ACG(T) | 110 | 0.41 | 112 | 0.41 | 110 | 0.41 | 110 | 0.41 | 110 | 0.41 | 112 | 0.41 | 114 | 0.42 | 113 | 0.42 | 112 | 0.41 | 112 | 0.41 |
| GCU(A) | 542 | 1.89 | 542 | 1.88 | 542 | 1.89 | 543 | 1.89 | 543 | 1.89 | 544 | 1.89 | 541 | 1.89 | 541 | 1.87 | 543 | 1.88 | 545 | 1.89 |
| GCC(A) | 175 | 0.61 | 174 | 0.6  | 175 | 0.61 | 175 | 0.61 | 175 | 0.61 | 180 | 0.62 | 173 | 0.6  | 177 | 0.61 | 177 | 0.61 | 175 | 0.61 |
| GCA(A) | 318 | 1.11 | 320 | 1.11 | 318 | 1.11 | 317 | 1.1  | 317 | 1.1  | 312 | 1.08 | 318 | 1.11 | 318 | 1.1  | 316 | 1.09 | 315 | 1.09 |
| GCG(A) | 114 | 0.4  | 115 | 0.4  | 114 | 0.4  | 114 | 0.4  | 114 | 0.4  | 118 | 0.41 | 116 | 0.4  | 120 | 0.42 | 119 | 0.41 | 120 | 0.42 |
| UAU(Y) | 649 | 1.64 | 650 | 1.64 | 649 | 1.64 | 650 | 1.64 | 650 | 1.64 | 657 | 1.65 | 651 | 1.64 | 655 | 1.65 | 654 | 1.65 | 654 | 1.65 |
| UAC(Y) | 143 | 0.36 | 142 | 0.36 | 143 | 0.36 | 142 | 0.36 | 143 | 0.36 | 138 | 0.35 | 142 | 0.36 | 140 | 0.35 | 141 | 0.35 | 141 | 0.35 |
| UAA(*) | 34  | 1.92 | 35  | 1.98 | 34  | 1.92 | 34  | 1.92 | 34  | 1.92 | 34  | 1.92 | 35  | 1.98 | 34  | 1.92 | 34  | 1.92 | 35  | 1.98 |
| UAG(*) | 13  | 0.74 | 12  | 0.68 | 13  | 0.74 | 13  | 0.74 | 13  | 0.74 | 13  | 0.74 | 12  | 0.68 | 12  | 0.68 | 12  | 0.68 | 12  | 0.68 |
| CAU(H) | 367 | 1.5  | 368 | 1.5  | 367 | 1.5  | 366 | 1.5  | 367 | 1.5  | 369 | 1.49 | 368 | 1.51 | 368 | 1.5  | 368 | 1.5  | 366 | 1.49 |
| CAC(H) | 123 | 0.5  | 123 | 0.5  | 123 | 0.5  | 123 | 0.5  | 123 | 0.5  | 125 | 0.51 | 121 | 0.49 | 123 | 0.5  | 124 | 0.5  | 126 | 0.51 |
| CAA(Q) | 613 | 1.59 | 614 | 1.59 | 613 | 1.59 | 613 | 1.59 | 613 | 1.59 | 611 | 1.57 | 614 | 1.59 | 615 | 1.58 | 615 | 1.58 | 614 | 1.58 |
| CAG(Q) | 160 | 0.41 | 160 | 0.41 | 160 | 0.41 | 160 | 0.41 | 160 | 0.41 | 165 | 0.43 | 160 | 0.41 | 164 | 0.42 | 163 | 0.42 | 165 | 0.42 |
| AAU(N) | 793 | 1.52 | 790 | 1.53 | 794 | 1.53 | 794 | 1.53 | 795 | 1.53 | 789 | 1.53 | 791 | 1.52 | 793 | 1.53 | 790 | 1.53 | 790 | 1.53 |
| AAC(N) | 248 | 0.48 | 246 | 0.47 | 247 | 0.47 | 247 | 0.47 | 247 | 0.47 | 241 | 0.47 | 249 | 0.48 | 242 | 0.47 | 243 | 0.47 | 242 | 0.47 |
| AAA(K) | 927 | 1.58 | 926 | 1.58 | 927 | 1.58 | 925 | 1.58 | 926 | 1.58 | 930 | 1.58 | 927 | 1.58 | 928 | 1.58 | 925 | 1.58 | 928 | 1.58 |
| AAG(K) | 245 | 0.42 | 249 | 0.42 | 245 | 0.42 | 246 | 0.42 | 246 | 0.42 | 246 | 0.42 | 246 | 0.42 | 246 | 0.42 | 247 | 0.42 | 245 | 0.42 |
| GAU(D) | 675 | 1.61 | 676 | 1.61 | 675 | 1.61 | 674 | 1.61 | 674 | 1.61 | 674 | 1.61 | 674 | 1.61 | 674 | 1.61 | 676 | 1.61 | 673 | 1.61 |
| GAC(D) | 162 | 0.39 | 163 | 0.39 | 162 | 0.39 | 164 | 0.39 | 163 | 0.39 | 164 | 0.39 | 164 | 0.39 | 165 | 0.39 | 164 | 0.39 | 165 | 0.39 |
| GAA(E) | 876 | 1.54 | 876 | 1.55 | 876 | 1.54 | 876 | 1.54 | 877 | 1.54 | 881 | 1.54 | 876 | 1.55 | 877 | 1.54 | 878 | 1.54 | 880 | 1.54 |
| GAG(E) | 260 | 0.46 | 257 | 0.45 | 260 | 0.46 | 260 | 0.46 | 262 | 0.46 | 261 | 0.46 | 257 | 0.45 | 263 | 0.46 | 263 | 0.46 | 261 | 0.46 |
| UGU(C) | 185 | 1.51 | 187 | 1.52 | 185 | 1.51 | 185 | 1.51 | 186 | 1.51 | 181 | 1.48 | 187 | 1.51 | 183 | 1.5  | 181 | 1.49 | 181 | 1.49 |
| UGC(C) | 60  | 0.49 | 59  | 0.48 | 60  | 0.49 | 60  | 0.49 | 60  | 0.49 | 63  | 0.52 | 60  | 0.49 | 61  | 0.5  | 62  | 0.51 | 62  | 0.51 |
| UGA(*) | 6   | 0.34 | 6   | 0.34 | 6   | 0.34 | 6   | 0.34 | 6   | 0.34 | 6   | 0.34 | 6   | 0.34 | 7   | 0.4  | 7   | 0.4  | 6   | 0.34 |
| UGG(W) | 379 | 1    | 378 | 1    | 379 | 1    | 378 | 1    | 377 | 1    | 379 | 1    | 378 | 1    | 379 | 1    | 379 | 1    | 379 | 1    |
| CGU(R) | 279 | 1.36 | 283 | 1.38 | 279 | 1.36 | 281 | 1.36 | 281 | 1.36 | 284 | 1.38 | 285 | 1.38 | 278 | 1.36 | 283 | 1.38 | 284 | 1.39 |
| CGC(R) | 91  | 0.44 | 91  | 0.44 | 91  | 0.44 | 91  | 0.44 | 91  | 0.44 | 86  | 0.42 | 89  | 0.43 | 89  | 0.44 | 89  | 0.43 | 88  | 0.43 |
| CGA(R) | 282 | 1.37 | 278 | 1.35 | 281 | 1.37 | 281 | 1.36 | 281 | 1.36 | 286 | 1.39 | 280 | 1.36 | 284 | 1.39 | 285 | 1.39 | 282 | 1.38 |
| CGG(R) | 101 | 0.49 | 100 | 0.49 | 102 | 0.5  | 101 | 0.49 | 101 | 0.49 | 96  | 0.47 | 99  | 0.48 | 97  | 0.47 | 96  | 0.47 | 96  | 0.47 |
| AGU(S) | 335 | 1.26 | 334 | 1.26 | 335 | 1.26 | 334 | 1.26 | 334 | 1.26 | 332 | 1.26 | 333 | 1.26 | 333 | 1.26 | 332 | 1.26 | 330 | 1.25 |
| AGC(S) | 91  | 0.34 | 90  | 0.34 | 91  | 0.34 | 90  | 0.34 | 90  | 0.34 | 90  | 0.34 | 90  | 0.34 | 88  | 0.33 | 88  | 0.33 | 90  | 0.34 |

|        |       |      |       |      |       |      |       |      |       |      |       |      |       |      |       |      |       |      |       |      |
|--------|-------|------|-------|------|-------|------|-------|------|-------|------|-------|------|-------|------|-------|------|-------|------|-------|------|
| AGA(R) | 365   | 1.77 | 367   | 1.78 | 364   | 1.77 | 367   | 1.78 | 367   | 1.78 | 368   | 1.79 | 366   | 1.78 | 369   | 1.8  | 368   | 1.8  | 367   | 1.8  |
| AGG(R) | 116   | 0.56 | 115   | 0.56 | 116   | 0.56 | 116   | 0.56 | 118   | 0.57 | 111   | 0.54 | 116   | 0.56 | 110   | 0.54 | 109   | 0.53 | 109   | 0.53 |
| GGU(G) | 493   | 1.35 | 490   | 1.34 | 493   | 1.35 | 494   | 1.35 | 496   | 1.36 | 497   | 1.37 | 492   | 1.35 | 501   | 1.38 | 499   | 1.37 | 497   | 1.37 |
| GGC(G) | 139   | 0.38 | 143   | 0.39 | 139   | 0.38 | 138   | 0.38 | 138   | 0.38 | 140   | 0.39 | 142   | 0.39 | 137   | 0.38 | 139   | 0.38 | 141   | 0.39 |
| GGA(G) | 596   | 1.63 | 593   | 1.63 | 596   | 1.63 | 596   | 1.63 | 598   | 1.64 | 588   | 1.62 | 595   | 1.63 | 593   | 1.63 | 596   | 1.64 | 594   | 1.63 |
| GGG(G) | 231   | 0.63 | 232   | 0.64 | 231   | 0.63 | 232   | 0.64 | 230   | 0.63 | 227   | 0.63 | 231   | 0.63 | 223   | 0.61 | 223   | 0.61 | 224   | 0.62 |
| Total  | 21280 |      | 21276 |      | 21280 |      | 21280 |      | 21302 |      | 21279 |      | 21280 |      | 21285 |      | 21284 |      | 21279 |      |



**Table S4 Long repeat sequences comparison of ten *Rorippa* species.**

|                        | F  | P  | R | C | Total |
|------------------------|----|----|---|---|-------|
| <i>R. globosa</i>      | 16 | 14 | 2 | 1 | 33    |
| <i>R. indica</i>       | 18 | 13 | 2 | 1 | 34    |
| <i>R. palustris</i>    | 17 | 14 | 3 | 2 | 36    |
| <i>R. sylvestris</i>   | 29 | 15 | 1 | 0 | 45    |
| <i>R. amphibia</i>     | 18 | 17 | 1 | 0 | 36    |
| <i>R. cantoniensis</i> | 26 | 12 | 0 | 0 | 38    |
| <i>R. dubia</i>        | 18 | 13 | 1 | 2 | 34    |
| <i>R. mexicana</i>     | 26 | 13 | 1 | 1 | 41    |
| <i>R. sessiliflora</i> | 22 | 17 | 1 | 1 | 41    |
| <i>R. teres</i>        | 17 | 13 | 0 | 2 | 32    |

F: forward repeats, P: palindromic repeats, R: reverse repeats, C: complementary repeat.

**Table S5 Simple sequence repeats (SSRs) comparison of ten *Rorippa* species.**

|                        | Mononucleotide | Dinucleotide | Trinucleotide | Tetranucleotide | Pentanucleotide | Hexanucleotide | Total |
|------------------------|----------------|--------------|---------------|-----------------|-----------------|----------------|-------|
| <i>R. globosa</i>      | 77             | 19           | 3             | 8               |                 |                | 107   |
| <i>R. indica</i>       | 73             | 18           | 3             | 8               | 2               |                | 104   |
| <i>R. palustris</i>    | 77             | 19           | 3             | 8               |                 | 1              | 108   |
| <i>R. sylvestris</i>   | 75             | 19           | 4             | 8               |                 |                | 106   |
| <i>R. amphibia</i>     | 74             | 19           | 3             | 8               |                 |                | 104   |
| <i>R. cantoniensis</i> | 75             | 17           | 4             | 7               | 1               |                | 104   |
| <i>R. dubia</i>        | 75             | 18           | 3             | 8               |                 |                | 104   |
| <i>R. mexicana</i>     | 74             | 20           | 3             | 5               |                 |                | 102   |
| <i>R. sessiliflora</i> | 76             | 20           | 3             | 9               | 1               | 2              | 111   |
| <i>R. teres</i>        | 72             | 19           | 3             | 7               |                 | 2              | 103   |

**Table S6 Pi values in coding and non-coding regions of ten *Rorippa* plastomes.**

| Coding region | Pi       | Region | Non-coding region | Pi       | Region |
|---------------|----------|--------|-------------------|----------|--------|
| psbA          | 0.002469 | LSC    | trnH-GUG-psbA     | 0.026496 | LSC    |
| matK          | 0.010414 | LSC    | psbA-trnK-UUU     | 0.010569 | LSC    |
| rps16         | 0.003496 | LSC    | trnK-UUU-matK     | 0.013699 | LSC    |
| atpA          | 0.004885 | LSC    | matK-trnK-UUU     | 0.007438 | LSC    |
| atpF          | 0.005646 | LSC    | trnK-UUU-rps16    | 0.021995 | LSC    |
| atpH          | 0        | LSC    | rps16 intron      | 0.011035 | LSC    |
| atpI          | 0.004148 | LSC    | rps16-trnQ-UUG    | 0.024129 | LSC    |
| rps2          | 0.005157 | LSC    | trnQ-UUG-psbK     | 0.011537 | LSC    |
| rpoC2         | 0.005813 | LSC    | psbK-psbI         | 0.024374 | LSC    |
| rpoC1         | 0.003013 | LSC    | trnS-GCU-trnG-UCC | 0.012747 | LSC    |
| rpoB          | 0.003445 | LSC    | trnG-UCC intron   | 0.004622 | LSC    |
| psbD          | 0.002699 | LSC    | trnR-UCU-atpA     | 0.014183 | LSC    |
| psbC          | 0.003688 | LSC    | atpF intron       | 0.005991 | LSC    |
| rps14         | 0        | LSC    | atpF-atpH         | 0.011014 | LSC    |
| psaB          | 0.001592 | LSC    | atpH-atpI         | 0.009505 | LSC    |
| psaA          | 0.002426 | LSC    | atpI-rps2         | 0.008908 | LSC    |
| ycf3          | 0.004602 | LSC    | rps2-rpoC2        | 0.009259 | LSC    |
| rps4          | 0.000917 | LSC    | rpoC1 intron      | 0.007322 | LSC    |
| ndhJ          | 0.003075 | LSC    | rpoB-trnC-GCA     | 0.01563  | LSC    |
| ndhK          | 0.00413  | LSC    | trnC-GCA-petN     | 0.018601 | LSC    |
| ndhC          | 0.00202  | LSC    | petN-psbM         | 0.017336 | LSC    |
| atpE          | 0.003676 | LSC    | psbM-trnD-GUC     | 0.018456 | LSC    |
| atpB          | 0.004973 | LSC    | trnD-GUC-trnY-GUA | 0.021847 | LSC    |
| rbcL          | 0.007747 | LSC    | trnE-UUC-trnT-GGU | 0.020734 | LSC    |
| accD          | 0.004276 | LSC    | trnT-GGU-psbD     | 0.011525 | LSC    |
| ycf4          | 0.002402 | LSC    | trnS-UGA-psbZ     | 0.00994  | LSC    |
| cemA          | 0.004992 | LSC    | psbZ-trnG-GCC     | 0.021574 | LSC    |
| petA          | 0.004477 | LSC    | psaA-ycf3         | 0.011873 | LSC    |
| psbE          | 0.002116 | LSC    | ycf3 intron1      | 0.005274 | LSC    |
| rpl33         | 0.006302 | LSC    | ycf3 intron2      | 0.002899 | LSC    |
| rps18         | 0.004793 | LSC    | ycf3-trnS-GGA     | 0.008011 | LSC    |
| rpl20         | 0.008726 | LSC    | trnS-GGA-rps4     | 0.011752 | LSC    |
| rps12         | 0        | LSC    | rps4-trnT-UGU     | 0.009928 | LSC    |
| clpP          | 0.000338 | LSC    | trnT-UGU-trnL-UAA | 0.01137  | LSC    |
| psbB          | 0.004846 | LSC    | trnL-UAA intron   | 0.0092   | LSC    |
| psbH          | 0.002402 | LSC    | trnL-UAA-trnF-GAA | 0.01464  | LSC    |
| petB          | 0.002058 | LSC    | trnF-GAA-ndhJ     | 0.024892 | LSC    |
| petD          | 0.001104 | LSC    | ndhC-trnV-UAC     | 0.015975 | LSC    |
| rpoA          | 0.004991 | LSC    | trnV-UAC intron   | 0.003085 | LSC    |
| rps11         | 0.00405  | LSC    | atpB-rbcL         | 0.009471 | LSC    |
| rps8          | 0.005761 | LSC    | rbcL-accD         | 0.015377 | LSC    |
| rpl14         | 0.003433 | LSC    | accD-psaI         | 0.01471  | LSC    |

|        |          |        |                   |          |     |
|--------|----------|--------|-------------------|----------|-----|
| rpl16  | 0.007898 | LSC    | psaI-ycf4         | 0.007998 | LSC |
| rps3   | 0.00345  | LSC    | ycf4-cemA         | 0.019551 | LSC |
| rpl22  | 0.007315 | LSC    | cemA-petA         | 0.013471 | LSC |
| rps19  | 0.001434 | LSC/IR | petA-psbJ         | 0.017332 | LSC |
| rpl2   | 0.002667 | IR     | psbE-petL         | 0.020838 | LSC |
| rpl23  | 0        | IR     | petL-petG         | 0.022719 | LSC |
| ycf2   | 0.001167 | IR     | trnP-UGG-psaJ     | 0.01723  | LSC |
| ndhB   | 0.000866 | IR     | psaJ-rpl33        | 0.017619 | LSC |
| rps7   | 0.001567 | IR     | rpl33-rps18       | 0.015307 | LSC |
| rrna16 | 0        | IR     | rps18-rpl20       | 0.010733 | LSC |
| rrna23 | 0.00038  | IR     | rpl20-rps12       | 0.00855  | LSC |
| ycf1a  | 0.002289 | IR     | clpP intron1      | 0.007553 | LSC |
| ndhF   | 0.005369 | SSC    | clpP intron2      | 0.009127 | LSC |
| ccsA   | 0.008083 | SSC    | clpP-psbB         | 0.008333 | LSC |
| ndhD   | 0.003356 | SSC    | petB intron       | 0.009285 | LSC |
| psaC   | 0.005149 | SSC    | petD intron       | 0.010448 | LSC |
| ndhE   | 0.009877 | SSC    | petD-rpoA         | 0.019127 | LSC |
| ndhG   | 0.005524 | SSC    | rpl36-rps8        | 0.012922 | LSC |
| ndhI   | 0.003263 | SSC    | rps8-rpl14        | 0.012391 | LSC |
| ndhA   | 0.004104 | SSC    | rpl16 intron      | 0.017544 | LSC |
| ndhH   | 0.001184 | SSC    | rpl2 intron       | 0        | IR  |
| rps15  | 0.000749 | SSC    | ycf2-trnL-CAA     | 0.000221 | IR  |
| ycf1b  | 0.01146  | SSC    | trnL-CAA-ndhB     | 0.000344 | IR  |
|        |          |        | ndhB intron       | 0.001071 | IR  |
|        |          |        | ndhB-rps7         | 0.003468 | IR  |
|        |          |        | rps12 intron      | 0        | IR  |
|        |          |        | rps12-trnV-GAC    | 0.002509 | IR  |
|        |          |        | trnV-GAC-rrn16    | 0        | IR  |
|        |          |        | rrn16-trnI-GAU    | 0.001796 | IR  |
|        |          |        | trnI-GAU intron   | 0.001336 | IR  |
|        |          |        | trnA-UGC intron   | 0.000667 | IR  |
|        |          |        | rrn4.5-rrn5       | 0.007287 | IR  |
|        |          |        | rrn5-trnR-ACG     | 0.003613 | IR  |
|        |          |        | trnR-ACG-trnN-GUU | 0.004528 | IR  |
|        |          |        | trnN-GUU-ycf1     | 0.000619 | IR  |
|        |          |        | ndhF-rpl32        | 0.017113 | SSC |
|        |          |        | rpl32-trnL-UAG    | 0.036942 | SSC |
|        |          |        | ccsA-ndhD         | 0.015764 | SSC |
|        |          |        | psaC-ndhE         | 0.010689 | SSC |
|        |          |        | ndhE-ndhG         | 0.020178 | SSC |
|        |          |        | ndhG-ndhI         | 0.012815 | SSC |
|        |          |        | ndhA intron       | 0.010472 | SSC |
|        |          |        | rps15-ycf1        | 0.015893 | SSC |

**Table S7 List of species and their accession numbers used for constructing the phylogenetic tree.**

| Species                            | Plastome  | nrDNA/ITS |
|------------------------------------|-----------|-----------|
| <i>Rorippa sylvestris</i>          | PP297068  | PP329014  |
| <i>Rorippa globosa</i>             | PP297065  | PP329011  |
| <i>Rorippa indica</i>              | PP297066  | PP329012  |
| <i>Rorippa palustris</i>           | PP297067  | PP329013  |
| <i>Rorippa cantoniensis</i>        | NC_070424 | ON616575  |
| <i>Rorippa dubia</i>               | NC_070412 | ON616603  |
| <i>Rorippa amphibia</i>            | ON411624  | ON616548  |
| <i>Rorippa mexicana</i>            | ON892569  | ON616640  |
| <i>Rorippa sessiliflora</i>        | ON892599  | ON616670  |
| <i>Rorippa teres</i>               | ON892567  | ON616690  |
| <i>Barbarea verna</i>              | NC_009269 | MG886675  |
| <i>Armoracia rusticana</i>         | NC_060501 | MG886676  |
| <i>Cardamine impatiens</i>         | NC_026445 | MT922979  |
| <i>Cardamine macrophylla</i>       | MF405340  | MH711273  |
| <i>Cardamine hirsuta</i>           | NC_049607 | MH808258  |
| <i>Nasturtium officinale</i>       | MK045962  | MW031318  |
| <i>Pachycladon ensyii</i>          | NC_018565 | EF015680  |
| <i>Arabidella trisecta</i>         | OL364740  | JX630158  |
| <i>Boechera laevigata</i>          | NC_049596 | DQ005987  |
| <i>Boechera puberula</i>           | NC_049597 | JX146949  |
| <i>Phoenicaulis cheiranthoides</i> | MK637770  | DQ399121  |
| <i>Lepidium virginicum</i>         | NC_009273 | LC090012  |
| <i>Lepidium sativum</i>            | NC_047178 | OM283255  |
| <i>Smelowskia altaica</i>          | MK637789  | EU489519  |
| <i>Smelowskia calycina</i>         | MK637794  | AY230641  |
| <i>Yinshania acutangula</i>        | MK637817  | KX244387  |
| <i>Yinshania henryi</i>            | NC_061291 | KX244388  |
| <i>Descurainia sophia</i>          | NC_049631 | MW432488  |
| <i>Robeschia schimperii</i>        | MK637786  | HQ896627  |
| <i>Tropidocarpum gracile</i>       | MK637812  | GQ497883  |
| <i>Thelypodium laciniatum</i>      | MK637813  | KJ953749  |
| <i>Mostacillastrum orbignyanum</i> | NC_049673 | MN836389  |
| <i>Sisymbrium officinale</i>       | MK637802  | MW271765  |
| <i>Sisymbrium altissimum</i>       | NC_059802 | MW271701  |
| <i>Brassica rapa</i>               | MT726210  | MK424344  |
| <i>Brassica napus</i>              | NC_016734 | KM975580  |
| <i>Raphanus sativus</i>            | KJ716483  | KM892621  |
| <i>Arabis hirsuta</i>              | NC_009268 | HQ646663  |
| <i>Arabis verna</i>                | NC_049591 | GU182043  |
| <i>Draba oreades</i>               | NC_037760 | DQ467410  |
| <i>Draba nemorosa</i>              | NC_009272 | DQ467361  |
| <i>Scapiarabis saxicola</i>        | MK637807  | JQ919855  |

---

|                                |           |          |
|--------------------------------|-----------|----------|
| <i>Pseudoturritis turrta</i>   | MK637782  | JQ919845 |
| <i>Megacarpaea delavayi</i>    | NC_034360 | KX244385 |
| <i>Pugionium dolabratum</i>    | NC_030515 | MT923159 |
| <i>Alyssum desertorum</i>      | KY498535  | KF512499 |
| <i>Alyssum alyssoides</i>      | NC_049574 | EF514596 |
| <i>Clypeola jonthlaspi</i>     | NC_049609 | EF514644 |
| <i>Clausia aprica</i>          | NC_049602 | LK021257 |
| <i>Dontostemon micranthus</i>  | NC_049628 | LK021230 |
| <i>Neotorularia torulosa</i>   | NC_049683 | AF137571 |
| <i>Braya humilis</i>           | NC_035515 | MH808255 |
| <i>Aethionema cordifolium</i>  | NC_009265 | MT799725 |
| <i>Aethionema grandiflorum</i> | NC_009266 | MT799723 |

---
